# Supplementary material for: Hypergravity Stimulation Enhances PC12 Neuron-Like Cell Differentiation
Source: Hindawi journal article supplement (doi:10.1155/2015/748121), 2015-01-01
Supplement: f1 [file 748121.f1.pdf]

## **Hypergravity stimulation enhances PC12 neuron-like cell differentiation**

Giada Graziana Genchi<sup>1,\*</sup>, Francesca Cialdai<sup>2</sup>, Monica Monici<sup>2</sup>, Barbara Mazzolai<sup>1</sup>,  
Virgilio Mattoli<sup>1</sup> and Gianni Ciofani<sup>1,\*</sup>

<sup>1</sup>Istituto Italiano di Tecnologia, Center for Micro-BioRobotics @SSSA, Viale Rinaldo Piaggio 34, 56025 Pontedera (Pisa), Italy

<sup>2</sup>ASAcampus Joint Laboratory, ASA Research Division, Department of Experimental and Clinical Biomedical Sciences, University of Florence, Viale Pieraccini 6, 50139 Florence, Italy

\*giada.genchi@iit.it, gianni.ciofani@iit.it

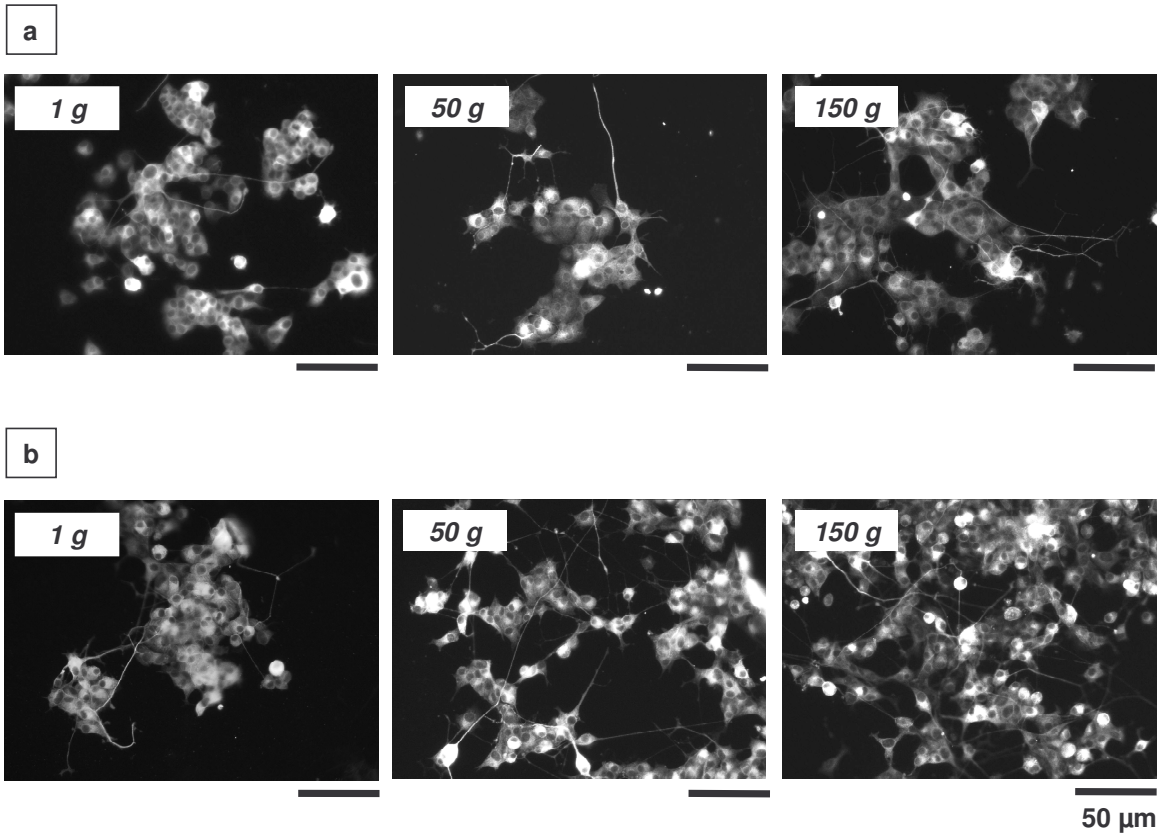

**Figure S1.** Immunofluorescence staining of  $\beta$ 3-tubulin in PC12 cell cultures pre-differentiated for 12 h (**a**) and 72 h (**b**). The staining was performed after 48 h from hypergravity treatment.

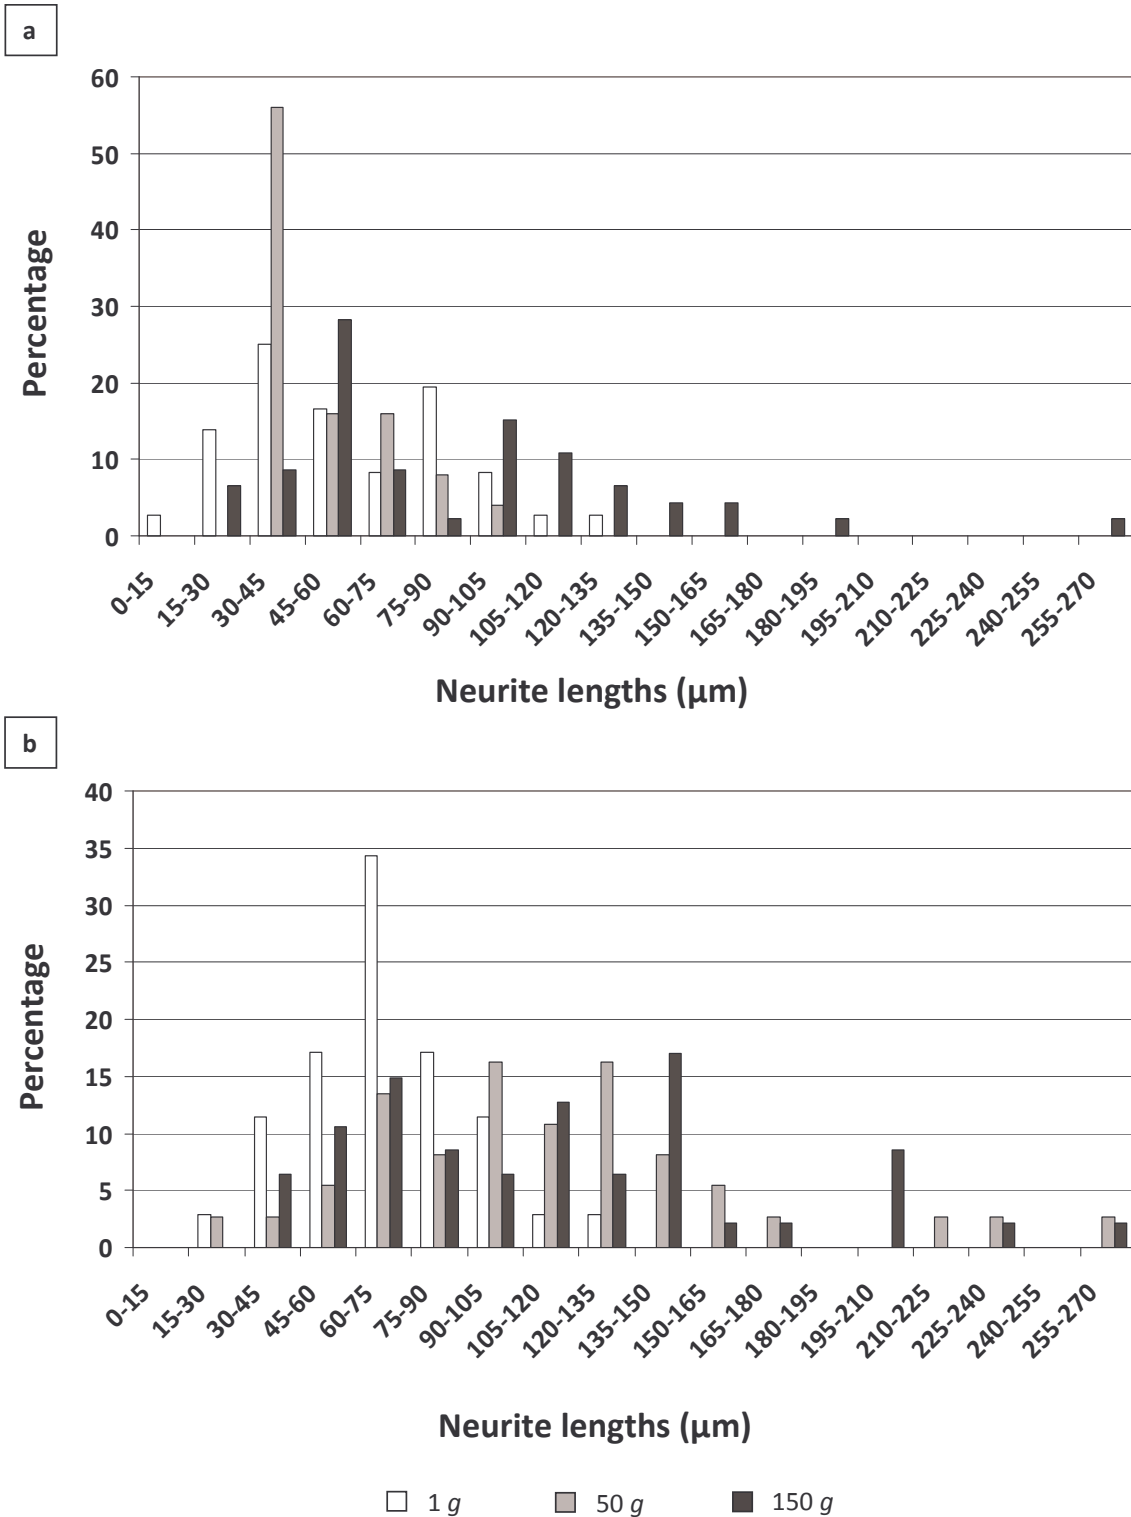

**Figure S2.** Neurite length distributions in PC12 cell cultures pre-differentiated for 12 h (a) and 72 h (b). The lengths were measured after 48 h from hypergravity treatment.

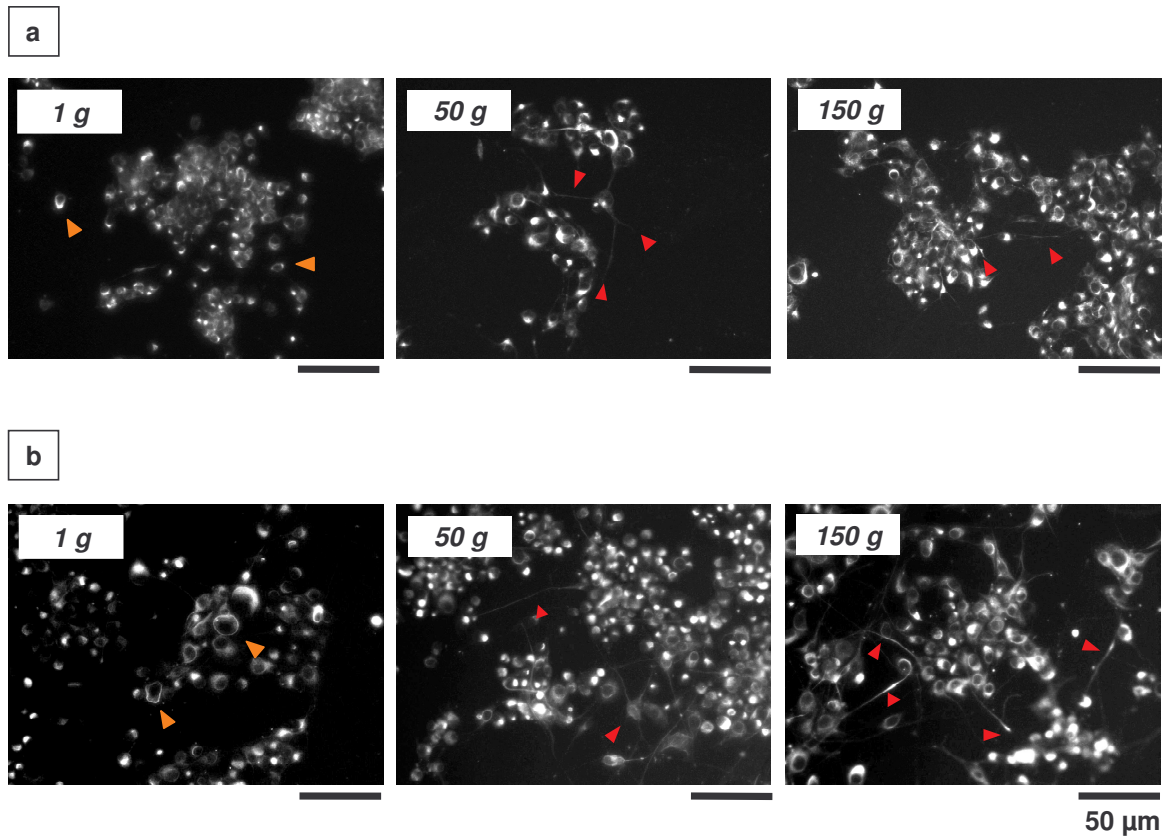

**Figure S3.** Immunofluorescent staining of neurofilament-66 in PC12 cell cultures pre-differentiated for 12 h (**a**) and 72 h (**b**). The staining was performed after 48 h from hypergravity treatment. Arrows evidence neurofilament-66 organization in a ring-like structure in control cultures, whereas the marker is localized in neurites and in growth cones of hypergravity-stimulated cells.
